# Supplementary material
Source: PubMed Central journal article supplement (PMC6907738)
Supplement: NIHMS1545308-supplement-8.pdf [file NIHMS1545308-supplement-8.pdf]

| <i>Amino Acid Postion</i> | 96       | 150      | 176      | 228      | 255      | 264      | 337      | 342      | 384      | 388-389    | Freq. (%) |
|---------------------------|----------|----------|----------|----------|----------|----------|----------|----------|----------|------------|-----------|
| Ref                       | G        | E        | N        | <i>M</i> | <i>R</i> | N        | D        | S        | I        | in         | 15.6      |
| G0                        | G        | <i>K</i> | N        | I        | K        | N        | D        | S        | I        | in         | 65.3      |
| G0 G96R                   | <i>R</i> | <i>K</i> | N        | I        | K        | N        | D        | S        | I        | in         | 3.1       |
| G0 N264K                  | G        | <i>K</i> | N        | I        | K        | <i>K</i> | D        | S        | I        | in         | 0.5       |
| G0 K150E                  | G        | E        | N        | I        | K        | N        | D        | S        | I        | in         | 3.2       |
| G0 K150E D337N            | G        | E        | N        | I        | K        | N        | <i>N</i> | S        | I        | in         | 1.1       |
| G0 K150E D337N N176S      | G        | E        | <i>S</i> | I        | K        | N        | <i>N</i> | S        | I        | in         | 1.0       |
| G1                        | G        | E        | N        | I        | K        | N        | D        | <i>G</i> | <i>M</i> | in         | 4.9       |
| G2                        | G        | E        | N        | I        | K        | N        | D        | S        | I        | <i>del</i> | 2.0       |

  

|              |   |   |   |          |          |          |   |          |          |            |  |
|--------------|---|---|---|----------|----------|----------|---|----------|----------|------------|--|
| Ref G1       | G | E | N | <i>M</i> | <i>R</i> | N        | D | <i>G</i> | <i>M</i> | in         |  |
| Ref G2       | G | E | N | <i>M</i> | <i>R</i> | N        | D | S        | I        | <i>del</i> |  |
| Ref G1 M228I | G | E | N | I        | <i>R</i> | N        | D | <i>G</i> | <i>M</i> | in         |  |
| Ref G1 R225K | G | E | N | <i>M</i> | K        | N        | D | <i>G</i> | <i>M</i> | in         |  |
| Ref G2 M228I | G | E | N | I        | <i>R</i> | N        | D | S        | I        | <i>del</i> |  |
| Ref G2 R225K | G | E | N | <i>M</i> | K        | N        | D | S        | I        | <i>del</i> |  |
| G1 N264K     | G | E | N | I        | K        | <i>K</i> | D | <i>G</i> | <i>M</i> | in         |  |
| G2 N264K     | G | E | N | I        | K        | <i>K</i> | D | S        | I        | <i>del</i> |  |

**Table S1:** Differences in the various Apol1 constructs at amino acid positions along the protein sequence. The upper table lists known common human Apol1 haplotypes while the lower table lists constructs created for this research. Above each amino acid position is the SNP IDs for each individual nucleotide mutation. Global haplotype frequencies for the natural human constructs were obtained from 1000 Genome Project phase 1 data (UCSC Genome Browser) and listed in the rightmost column.
