# Supplementary material
Source: PubMed Central journal article supplement (PMC6907738)
Supplement: NIHMS1545308-supplement-9.pdf [file NIHMS1545308-supplement-9.pdf]

| Haplotype            | Freq. %<br>(European) | Freq. %<br>(African) | Freq. %<br>(East Asian) |
|----------------------|-----------------------|----------------------|-------------------------|
| Ref                  | 22.2                  | 3.3                  | 18.9                    |
| G0                   | 72.3                  | 30.3                 | 78.8                    |
| G0 G96R              | 4.6                   | 4.5                  | 0.2                     |
| G0 N264K             | 0.0                   | 2.0                  | 0.0                     |
| G0 K150E             | 0.0                   | 13.4                 | 0.0                     |
| G0 K150E D337N       | 0.0                   | 4.5                  | 0.0                     |
| G0 K150E D337N N176S | 0.0                   | 3.9                  | 0.0                     |
| G1                   | 0.0                   | 21.1                 | 0.0                     |
| G2                   | 0.0                   | 8.5                  | 0.0                     |
| Other                | 0.9                   | 8.5                  | 2.1                     |

**Table S2:** Population frequencies of the common human Apol1 haplotypes tested in this study, as represented among subjects of European, African, and East Asian ancestry. Frequencies were obtained from 1000 Genome Project phase 1 data (UCSC Genome Browser) for Apol1.
