# Supplementary material
Source: PubMed Central journal article supplement (PMC6907738)
Supplement: NIHMS1545308-supplement-10.pdf [file NIHMS1545308-supplement-10.pdf]

| Reference                                                   | Experimental System                                          | Sequence Source Cited                                            | Haplotype (Provided or Inferred)                                                                                                             | Cytotoxicity and Related Phenotypes                                                                                                                                                                     |
|-------------------------------------------------------------|--------------------------------------------------------------|------------------------------------------------------------------|----------------------------------------------------------------------------------------------------------------------------------------------|---------------------------------------------------------------------------------------------------------------------------------------------------------------------------------------------------------|
| Anderson BR, et al. PLoS Genet. <b>11</b> 2015              | Zebrafish                                                    | GenBank: BC112943 (G0)                                           | Fig. 1.<br>C-terminus only.<br>Haplotypes cannot be inferred.                                                                                | G2 (but not G1) promotes developmental kidney defects.                                                                                                                                                  |
| Beckerman P, et al. Nat. Med. <b>23</b> 2017                | HEK293<br>Mouse podocyte<br>Mouse kidney                     | APOL1-CDS-NM-003                                                 | Sup. Fig. 1.<br>C-terminus only.<br>Haplotypes cannot be inferred.                                                                           | G1 and G2 expressing mice develop more proteinuria than G0 expressing mice.                                                                                                                             |
| Bruggeman LA, et al. J. Am. Soc. Nephrol. <b>27</b> 2016    | Mouse<br>Mouse podocyte                                      | GenBank: NM003661 (Ref)                                          | G2 deletion generated by 6bp deletion on G0 plasmid.                                                                                         | Transgenic G2 expression in podocytes leads to lower podocyte density and more severe preeclampsia phenotype than G0 expression.                                                                        |
| Cheng D, et al. J. Lipid Res. <b>56</b> 2015                | Mouse<br>Rat hepatoma<br>COS7                                | pIRES2-EGFP-APOL1 vector<br>Genotype not provided                | Not Available                                                                                                                                | All genotypes cytotoxic with overexpression in rat hepatoma cells (G1>G0=G2).                                                                                                                           |
| Fu Y, et al. J. Am. Soc. Nephrol. <b>28</b> 2017            | Drosophila<br>Nephrocyte                                     | G0 cDNA - GenBank: AAI43040 (Ref)<br>G1 cDNA - Patient podocytes | Likely Ref vs. G1 on natural background haplotype.                                                                                           | G1 expression causes increased lethality in Drosophila compared to G0. G1 expression causes larger nephrocyte size and lower nephrocyte number relative to G0.                                          |
| Granado D, et al. J. Am. Soc. Nephrol. <b>28</b> 2017       | Human podocyte<br>HEK293                                     | Human cDNA library derived from AB8 podocytes                    | Not Available                                                                                                                                | G1 and G2 stably expressed in HEK293 cells cause more toxicity than G0. G1 and G2 stably expressed in podocytes cause more toxicity than G0.                                                            |
| Hayek SS, et al. Nat. Med. <b>23</b> 2017                   | Podocyte<br>Mouse kidney                                     | GenBank: NM001136540 (Ref TV3)<br>GenBank: NM003661 (Ref)        | Not Available                                                                                                                                | In vivo gene delivery of G1 and G2 but not G0 cause proteinuria and foot process effacement in mice.                                                                                                    |
| Kruzel-Davila E, et al. J. Am. Soc. Nephrol. <b>28</b> 2017 | D. melanogaster<br>Nephrocyte<br>S. cerevisiae               | GenBank: NM145343 (Ref TV2)                                      | Fig. 1.<br>C-terminus only.<br>Haplotypes cannot be inferred.                                                                                | G1 and G2 cause increased nephrocyte cell death and lethality in fly, and increased toxicity in yeast compared to G0.                                                                                   |
| Lan X, et al. Am. J. Phys. Renal Phys. <b>307</b> 2014      | Human podocyte                                               | Not Available                                                    | Not Available                                                                                                                                | G1 and G2 expressing podocytes cause increased podocyte swelling, LDH release, and necrosis compared to G0 expressing podocytes.                                                                        |
| Lan X, et al. Exp. Mol. Pathol. <b>98</b> 2015              | Human podocyte<br>Co-cultured with human smooth muscle cells | Not Available                                                    | Not Available                                                                                                                                | More podocyte death when co-cultured with G1 or G2 expressing smooth muscle cells than with G0 expressing smooth muscle cells.                                                                          |
| Lan X, et al. Exp. Mol. Pathol. <b>99</b> 2015              | HEK293T                                                      | Not Available                                                    | Not Available                                                                                                                                | Overexpression of G1 and G2 more toxic than G0 in HEK293T cell.                                                                                                                                         |
| Ma L, et al. J. Am. Soc. Nephrol. <b>28</b> 2017            | HEK293                                                       | pIRES2-EGFP-APOL1 vector<br>Genotype not provided                | Not Available                                                                                                                                | G1/G2 expression causes mitochondrial dysfunction. G1/G2 moderately more toxic than G0.                                                                                                                 |
| Nichols B, et al. Kidney Int. <b>87</b> 2015                | HEK293<br>HUVEC                                              | GenBank: NM003661 (Ref)                                          | G0: Ref (E150 M228 R255).<br>G1 and G2: generated on natural haplotype backgrounds (E150 I228 K255).<br>Data not provided in original paper. | More cytotoxicity with G1 and G2 vs G0 overexpression by transient transfection in HEK293 cells.                                                                                                        |
| Okamoto K, et al. Commun. Biol. <b>1</b> 2018               | HEK293<br>Human podocyte<br>Human kidney bioposy             | HEK/Mice - NM001136540 (Ref TV3)<br>Mice - NM003661 (Ref)        | Sup. Fig. 1 & 8.<br>Small part of C-terminus.<br>Haplotype cannot be inferred.                                                               | G1 and G2 cause increased cytotoxicity when stably overexpressed in HEK293 cells compared to G0. G1 BAC transgenic mice have more albuminuria than G0 BAC transgenic mice in a glomerular injury model. |
| Olabisi OA, et al. Proc. Natl. Acad. Sci. <b>113</b> 2016   | HEK293                                                       | RefSeqORF: 1197 (Ref)                                            | G0: G0 (K150 I228 K255).<br>G1 and G2: generated on K150 background (K150 I228 K255).<br>Data not provided in original paper.                | G1 and G2 cause more cytotoxicity than G0 when expressed after stable transfection in HEK293 cells (Tet-induced).                                                                                       |
| Olabisi O, et al. Clin. Neph. <b>86</b> 2016                | Zebrafish                                                    | Not Available                                                    | Not Available                                                                                                                                | Podocyte specific expression of RV leads to increased glomerular histological defects compared to G0 but no overt phenotypes observed.                                                                  |

|                                                             |                |                             |                                                                                                                                                   |                                                                                                                                             |
|-------------------------------------------------------------|----------------|-----------------------------|---------------------------------------------------------------------------------------------------------------------------------------------------|---------------------------------------------------------------------------------------------------------------------------------------------|
| O'Toole JF, et al.<br>J. Am. Soc. Nephrol. <b>29</b> 2018   | HEK293         | GenBank: NM003661 (Ref)     | Sup. Fig. 5.<br>G0: Ref, G1 and G2 on Ref background<br>(E150 M228 R255).                                                                         | No differences in<br>cytotoxicity when comparing<br>G0 vs RV overexpression.                                                                |
| Thomson R, et al.<br>Proc. Natl. Acad. Sci. <b>111</b> 2014 | Mouse liver    | GenBank: NM003661 (Ref)     | Sup. Fig. 1 (Ref).                                                                                                                                | Hydrodynamic gene delivery of G1 and G2<br>but not G0 cause liver injury in mice.                                                           |
| Wen H, et al.<br>Biosci. Rep. <b>38</b> 2018                | Human podocyte | GenBank: NM145343 (Ref TV2) | Fig. 2.<br>C-terminus only.<br>Haplotypes cannot be inferred.                                                                                     | G1 and G2 cause increased ER stress,<br>decreased nephrin expression,<br>and more injury compared to G0<br>when overexpressed in podocytes. |
| Zhang J, et al.<br>Proc. Natl. Acad. Sci. <b>115</b> 2018   | HEK293         | RefSeqORF: 1197 (Ref)       | G0: G0 (K150 I228 K255).<br>G1 and G2: generated on<br>natural haplotype backgrounds<br>(E150 I228 K255).<br>Data not provided in original paper. | G1 and G2 stably expressed in HEK293 cells<br>cause more toxicity than G0.                                                                  |

**Table S3: APOL1 sequence and haplotype data from previously published papers.** We surveyed the literature through 2018 for papers that directly compared G0 and Risk Variants (RV) for APOL1-induced cytotoxicity and related phenotypes. The starting DNA source cited by the authors is presented in column 3 (“Sequence Source Cited”); GenBank entries almost exclusively contain the Reference APOL1 sequence and may not accurately reflect the sequence used in experiments. Column 4 reports either sequence data provided by the authors or the APOL1 haplotypes inferred where possible from sequence data and mutagenesis steps described in the paper’s methods. In general, APOL1 plasmids available from commercial sources encode the Reference sequence and RV engineered onto this background will generate non-toxic RV unless the amino acids at positions 228 and 255 are also engineered to match the RV background found in nature. Abbreviations: Transcript Variant (TV).
